# Supplementary material for: Supervised DNA Barcodes species classification: analysis, comparisons and results
Source: PubMed Central journal article supplement (PMC4022351; doi:10.1186/1756-0381-7-4), 2014-04-11
Supplement: 1756-0381-7-4-S1.pdf [file 1756-0381-7-4-S1.pdf]

## Supplementary material for the paper:

### SUPERVISED DNA BARCODES SPECIES CLASSIFICATION: ANALYSIS, COMPARISON AND RESULTS

Emanuel Weitschek, Giulia Fiscon, Giovanni Felici

#### Parameters configuration

Table S1 lists the standard configuration of parameters set to test the performances of the selected classification algorithms of Weka package (SVM, Jrip, J48, Naïve Bayes).

Table S1 Configuration Parameters

| Classifier             | Parameters                | Description                                                                                     | Value      |
|------------------------|---------------------------|-------------------------------------------------------------------------------------------------|------------|
| <b>SMO<br/>(SVM)</b>   | build logistic models     | whether to fit logistic models to the outputs                                                   | FALSE      |
|                        | c                         | complexity parameter C                                                                          | 1.0        |
|                        | epsilon                   | epsilon for round-off error                                                                     | $10^{-12}$ |
|                        | filterType                | determines how/if the data will be transformed                                                  | normalized |
|                        | kernel                    | kernel to use                                                                                   | polyKernel |
|                        | numFolds                  | number of folds for cross-validation used to generate training data for logistic models         | -1         |
|                        | tolerance parameters      | tolerance parameter                                                                             | 0.001      |
|                        | random seed               | number seed for cross-validation                                                                | 1          |
| <b>Jrip</b>            | fold                      | amount of data used for pruning. (one fold is used for pruning, the rest for growing the rules) | 3          |
|                        | seed                      | seed used for randomizing the data                                                              | 1          |
|                        | minNO                     | minimum total weight of the instances in a rule                                                 | 2.0        |
|                        | optimizations             | number of optimization runs                                                                     | 2          |
|                        | use pruning               | whether pruning is performed                                                                    | TRUE       |
| <b>J48</b>             | confidence factor         | confidence factor used for pruning                                                              | 0.25       |
|                        | minNumOb                  | minimum number of instances per leaf                                                            | 2          |
|                        | numFolds                  | number of folds for cross-validation used to generate training data for logistic models         | 3          |
|                        | reduced-error pruning     | whether reduced-error pruning is used instead of C.4.5 pruning                                  | FALSE      |
|                        | sub tree raising          | whether to consider the subtree raising operation when pruning                                  | TRUE       |
|                        | seed                      | seed used for randomizing the data when reduced-error pruning                                   | 1          |
|                        | unpruned                  | whether pruning is performed                                                                    | FALSE      |
|                        | use Laplace               | whether counts at leaves are smoothed based on Laplace                                          | FALSE      |
| <b>Naïve<br/>Bayes</b> | supervised discretization | use supervised discretization to convert numeric attributes to nominal ones                     | FALSE      |
|                        | kernel estimator          | use a kernel estimator for numeric attributes rather than a normal distribution                 | FALSE      |

## Empirical sequences classification results

The results of the supervised machine learning tested methods are shown for the eight empirical datasets (Cypraeidae, Drosophila, Inga, Bats, Fishes, Birds, Fungi, Algae). In particular, the performances on query set (test set) and reference set (training set) for each selected empirical dataset are drawn in Figure S1-S8. Each figure depicts results on empirical data through histograms that provide the accuracy rate for all analyzed methods on the query set (panel (a) of each picture) and reference set (panel (b) of each picture).

### Cypraeidae

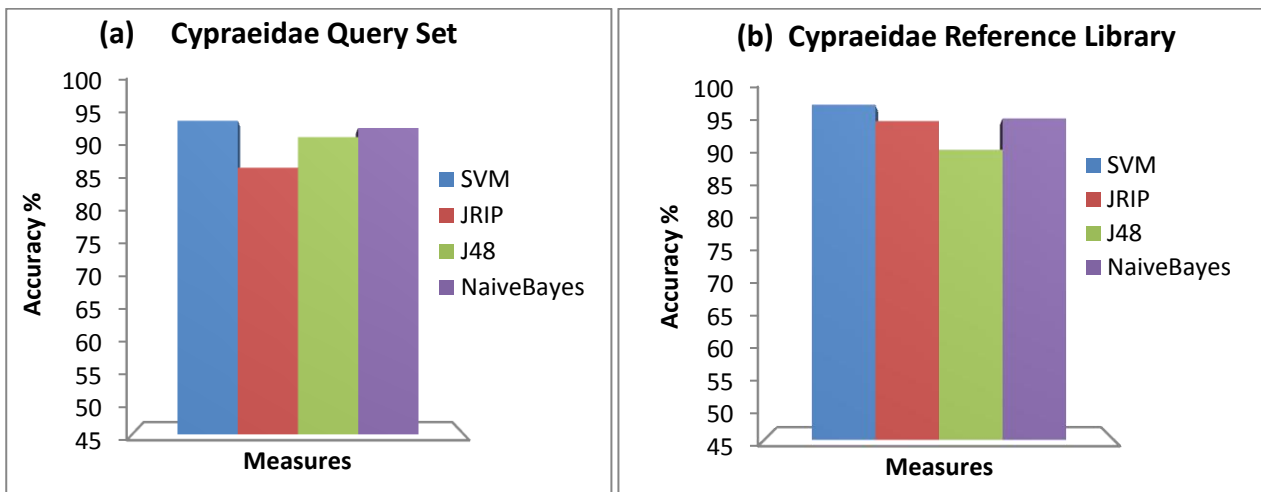

**Figure S1 Results on Cypraeidae dataset:** (a) DNA Barcode query identification success scores of four methods applied to Barcode sequence dataset; (b) DNA Barcode reference success scores of four methods applied to Barcode sequence dataset.

### Drosophila

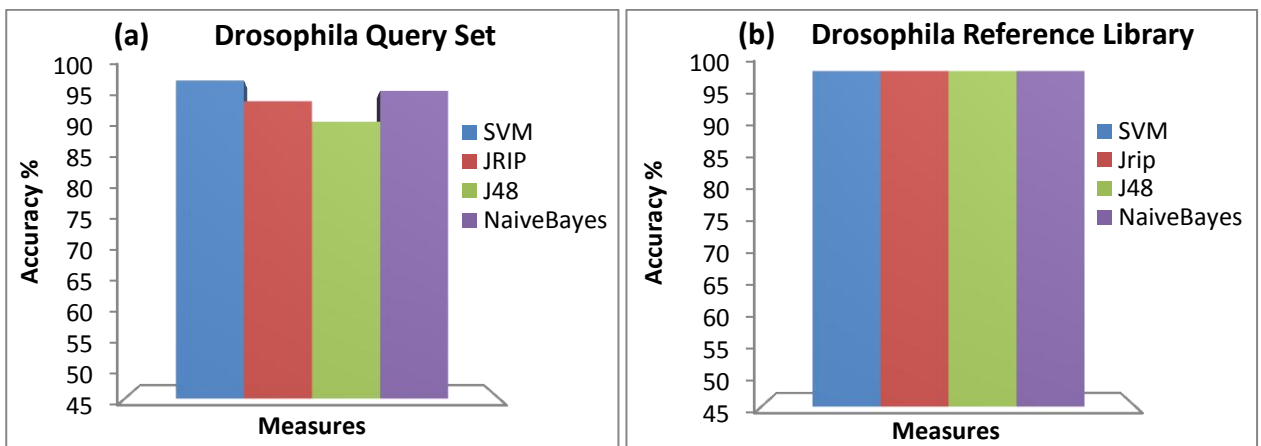

**Figure S2 Results on Drosophila dataset:** (a) DNA Barcode query identification success scores of four methods applied to Barcode sequence dataset; (b) DNA Barcode reference success scores of four methods applied to Barcode sequence dataset.

Inga

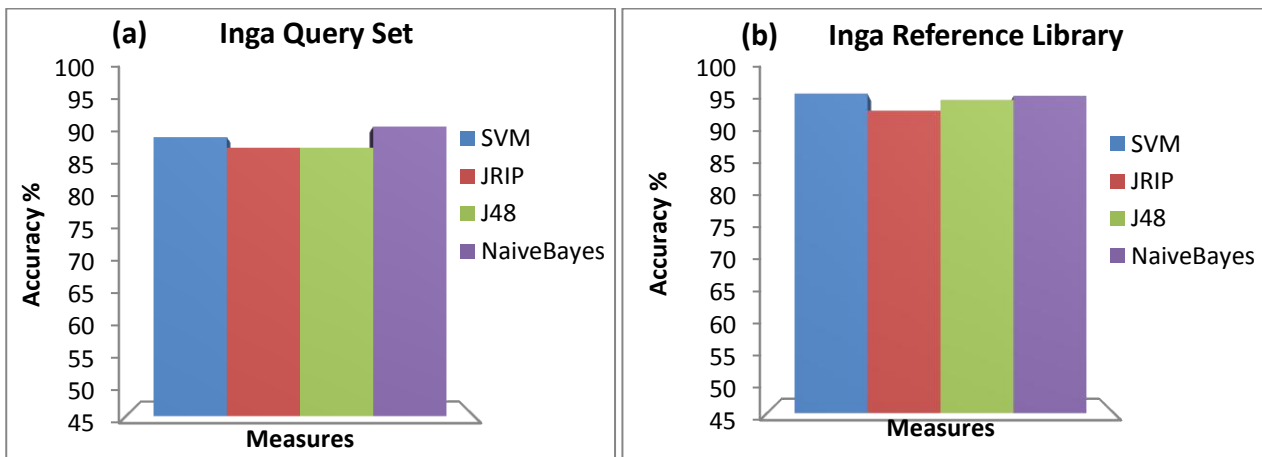

Figure S3 Results on Inga dataset: (a) DNA Barcode query identification success scores of four methods applied to Barcode sequence dataset; (b) DNA Barcode reference success scores of four methods applied to Barcode sequence dataset.

Bats

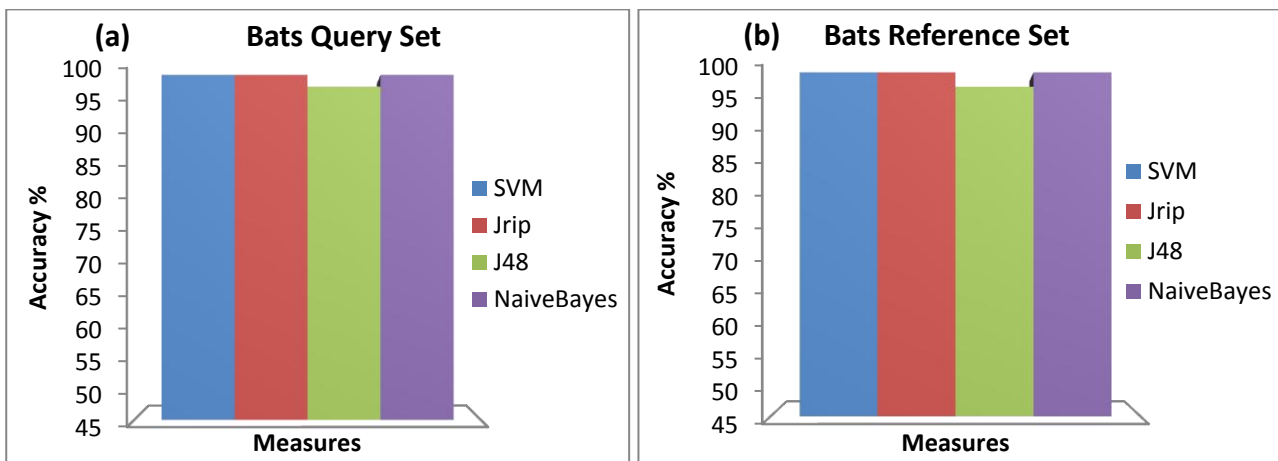

Figure S4 Results on Bats dataset: (a) DNA Barcode query identification success scores of four methods applied to Barcode sequence dataset; (b) DNA Barcode reference success scores of four methods applied to Barcode sequence dataset.

*Fishes*

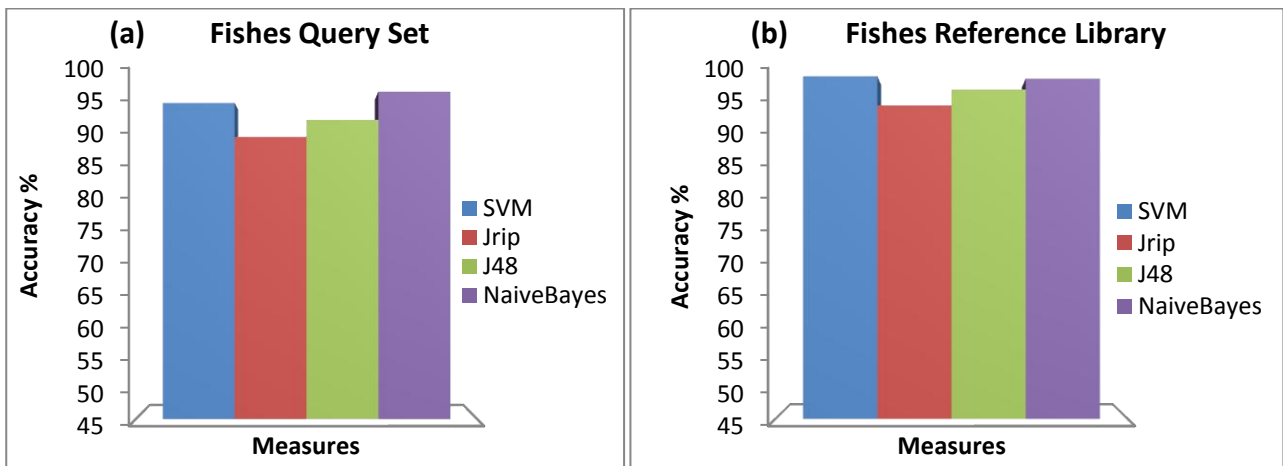

**Figure S5 Results on Fishes dataset:** (a) DNA Barcode query identification success scores of four methods applied to Barcode sequence dataset; (b) DNA Barcode reference success scores of four methods applied to Barcode sequence dataset.

*Birds*

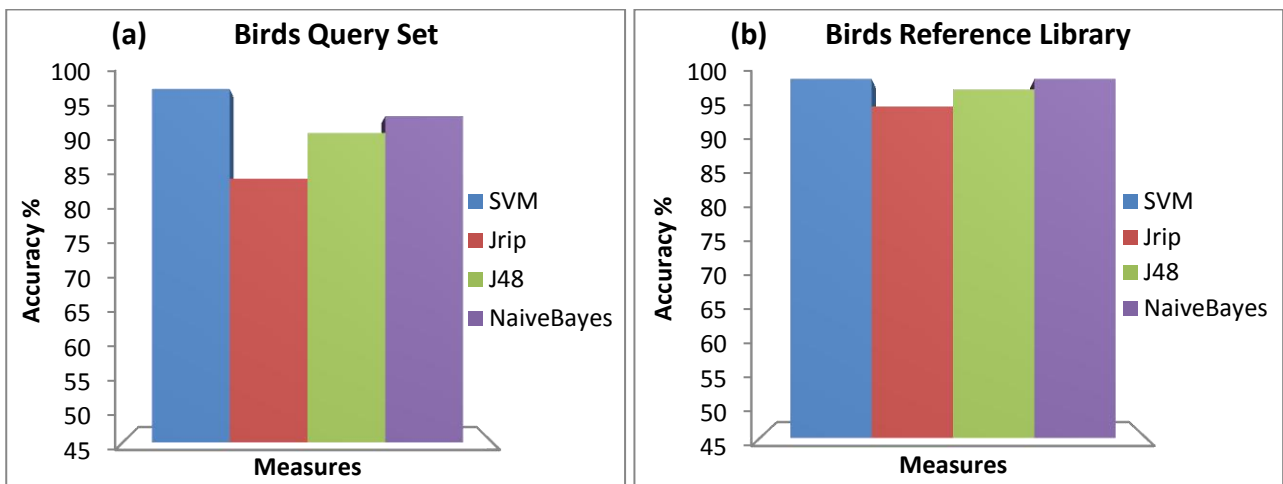

**Figure S6 Results on Birds dataset:** (a) DNA Barcode query identification success scores of four methods applied to Barcode sequence dataset; (b) DNA Barcode reference success scores of four methods applied to Barcode sequence dataset.

## Fungi

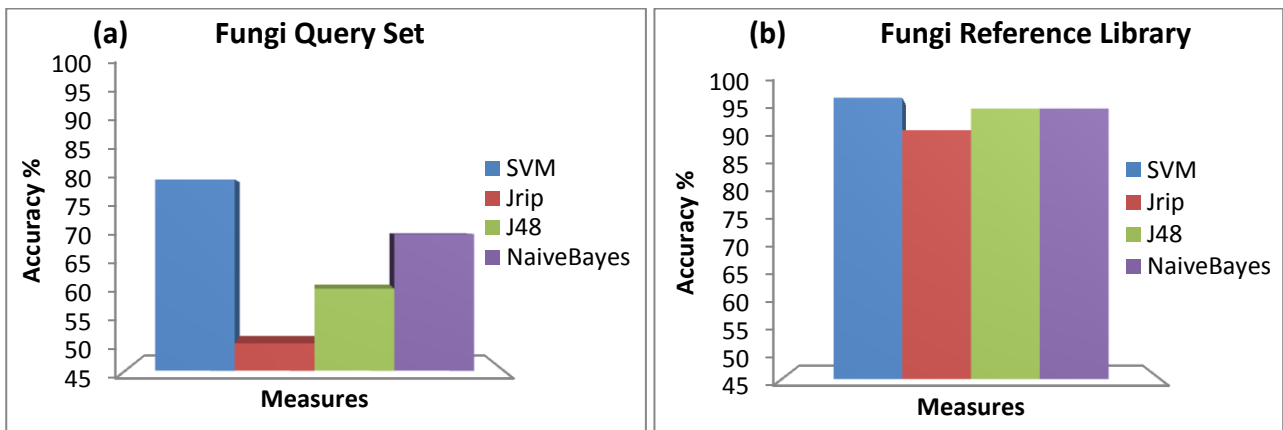

**Figure S7 Results on Fungi dataset:** (a) DNA Barcode query identification success scores of four methods applied to Barcode sequence dataset; (b) DNA Barcode reference success scores of four methods applied to Barcode sequence dataset.

## Algae

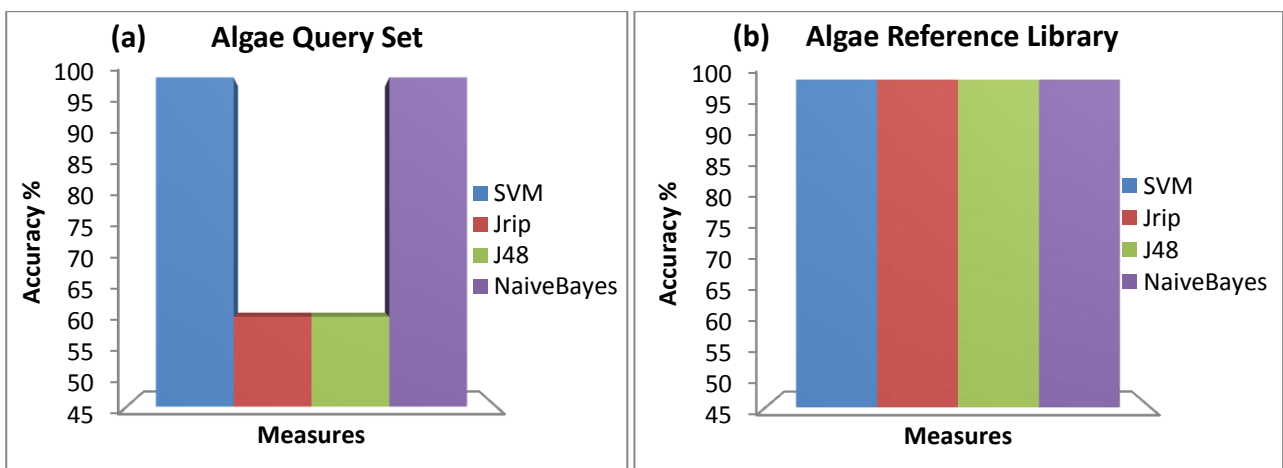

**Figure S8 Results on Algae dataset:** (a) DNA Barcode query identification success scores of four methods applied to Barcode sequence dataset; (b) DNA Barcode reference success scores of four methods applied to Barcode sequence dataset.

## Synthetic sequences classification results

The classification performances on query (test) and reference (training) sets of synthetic data with  $N_e$  equal to 1,000 – 10,000 – 50,000 are shown in Figure S9, Figure S10 and Figure S11, respectively. Each figure depicts results on synthetic data through histograms and bar-plots, in order to highlight the averaged performances (panels (b) and (d) of each picture) together with the standard deviations (panels (a) and (c) of each picture).

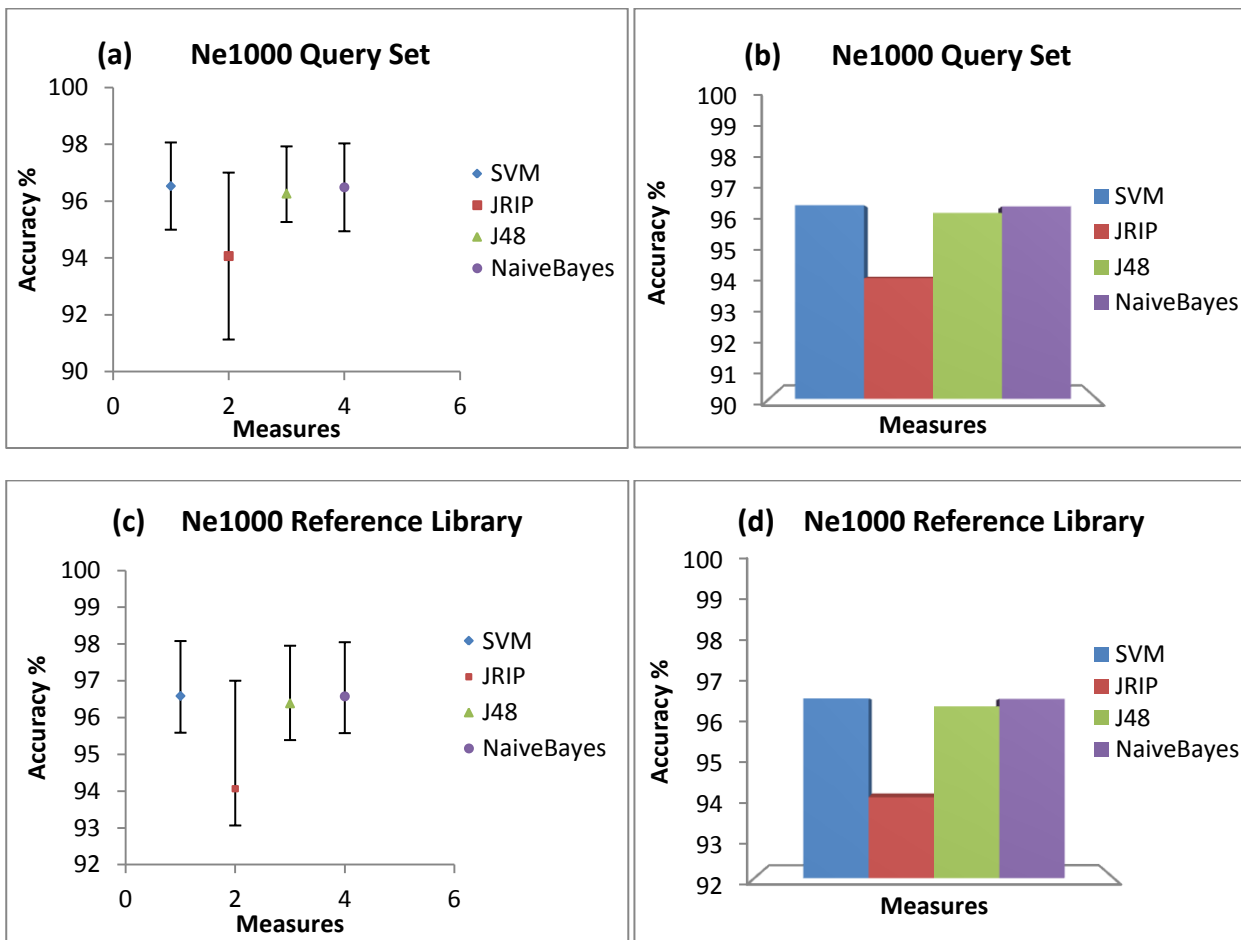

**Figure S9 Results of synthetic dataset with  $N_e$  equal to 1000:** (a) bar-plot of DNA Barcode query identification success scores considering for each method the averaged accuracy and its standard deviation; (b) DNA Barcode query identification success scores of four methods applied to Barcode sequence dataset; (c) bar-plot of DNA Barcode reference success scores considering for each method the averaged accuracy and its standard deviation; (d) DNA Barcode reference success scores of four methods applied to Barcode sequence dataset.

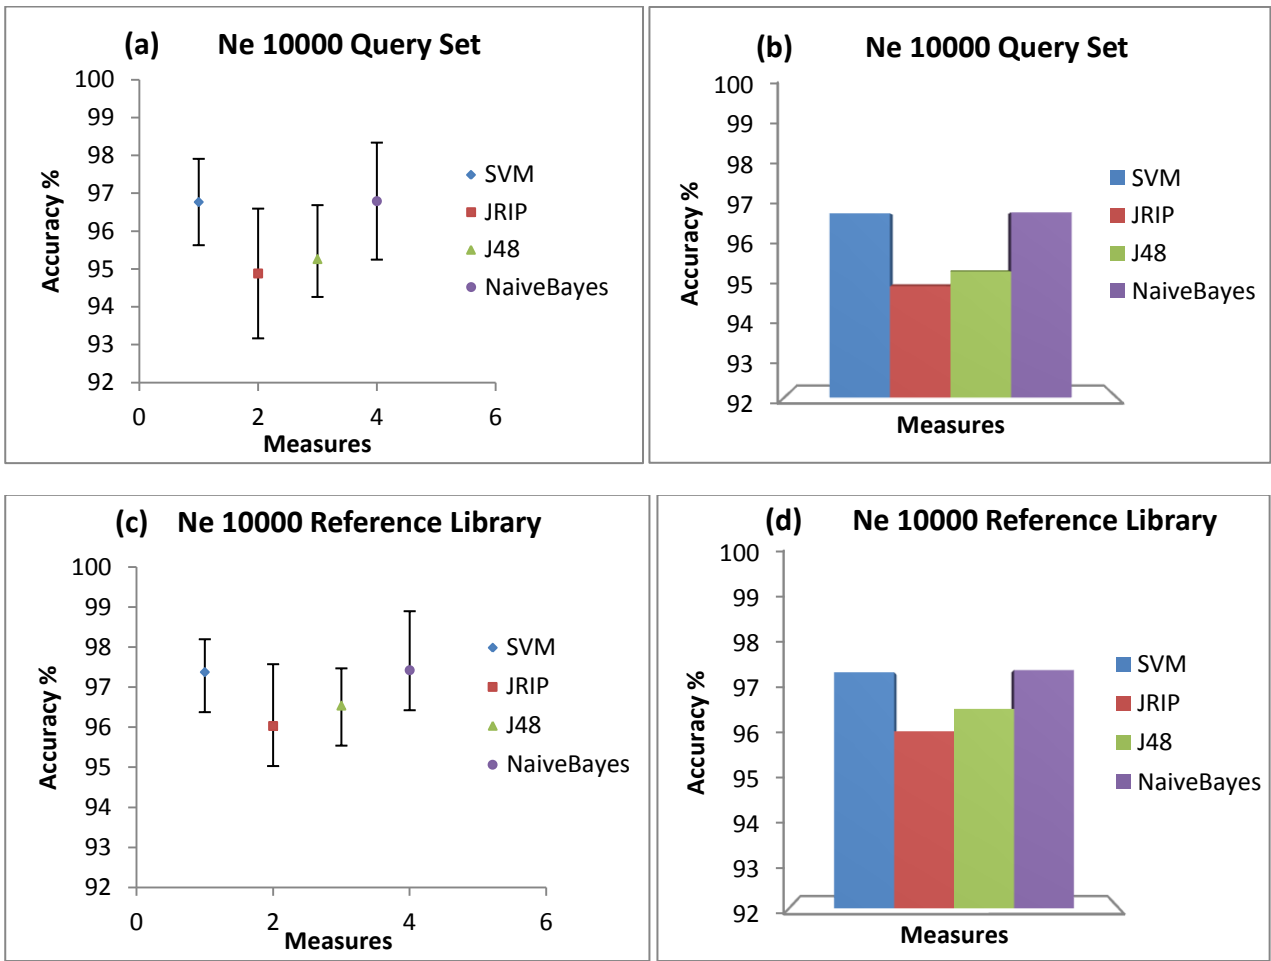

**Figure S10 Results of synthetic dataset with  $N_e$  equal to 10000:** (a) bar-plot of DNA Barcode query identification success scores considering for each method the averaged accuracy and its standard deviation; (b) DNA Barcode query identification success scores of four methods applied to Barcode sequence dataset; (c) bar-plot of DNA Barcode reference success scores considering for each method the averaged accuracy and its standard deviation; (d) DNA Barcode reference success scores of four methods applied to Barcode sequence dataset.

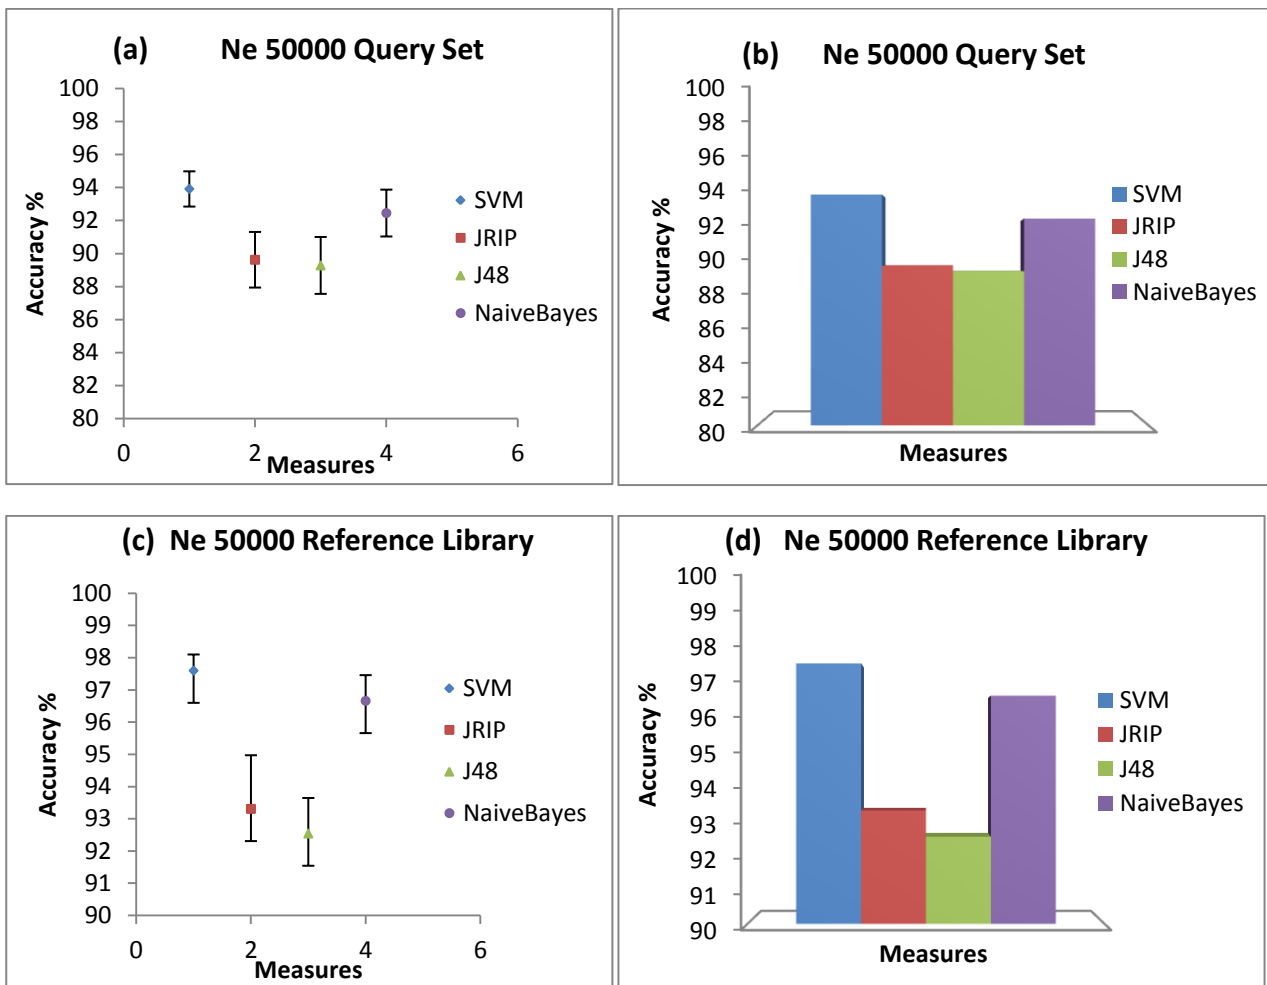

**Figure S11 Results of synthetic dataset with  $N_e$  equal to 50000:** (a) bar-plot of DNA Barcode query identification success scores considering for each method the averaged accuracy and its standard deviation; (b) DNA Barcode query identification success scores of four methods applied to Barcode sequence dataset; (c) bar-plot of DNA Barcode reference success scores considering for each method the averaged accuracy and its standard deviation; (d) DNA Barcode reference success scores of four methods applied to Barcode sequence dataset.

### Default VS different parameter configurations of Weka classifiers

Diverse parameter settings of the supervised machine learning algorithms in Weka have been tested on empirical and synthetic data according to the steps described in section *Experimental settings* of the paper. The classification performances of machine learning methods on three selected empirical datasets (i.e., Cypraeidae, Drosophila and Inga), using the configuration parameters of Table S1, are compared with the ones obtained using other configurations, that are listed in Table S2-S4 for Cypraeidae, Drosophila and Inga, respectively. The results of comparative analysis for the three empirical data sets are depicted in Figure S9-S11. No meaning differences among the analyzed configurations does exist, except to the configuration of Drosophila and Inga (number 3 in Table S3 and Table S4), where SVM uses a Logistic Model.



Cypraeidae

Table S2 Cypraeidae parameters configuration (see Table 3 for explanation of the default parameters configuration)

| #Configuration | Jrip           | SVM                  | J48                        | Naïve Bayes                    |
|----------------|----------------|----------------------|----------------------------|--------------------------------|
| 1              | default        | default              | default                    | default                        |
| 2              | pruning=FALSE  | built logistic model | reduce error pruning =TRUE | kernel estimator=TRUE          |
| 3              | optimization=4 | -                    | unpruned = TRUE            | supervised discretization=TRUE |

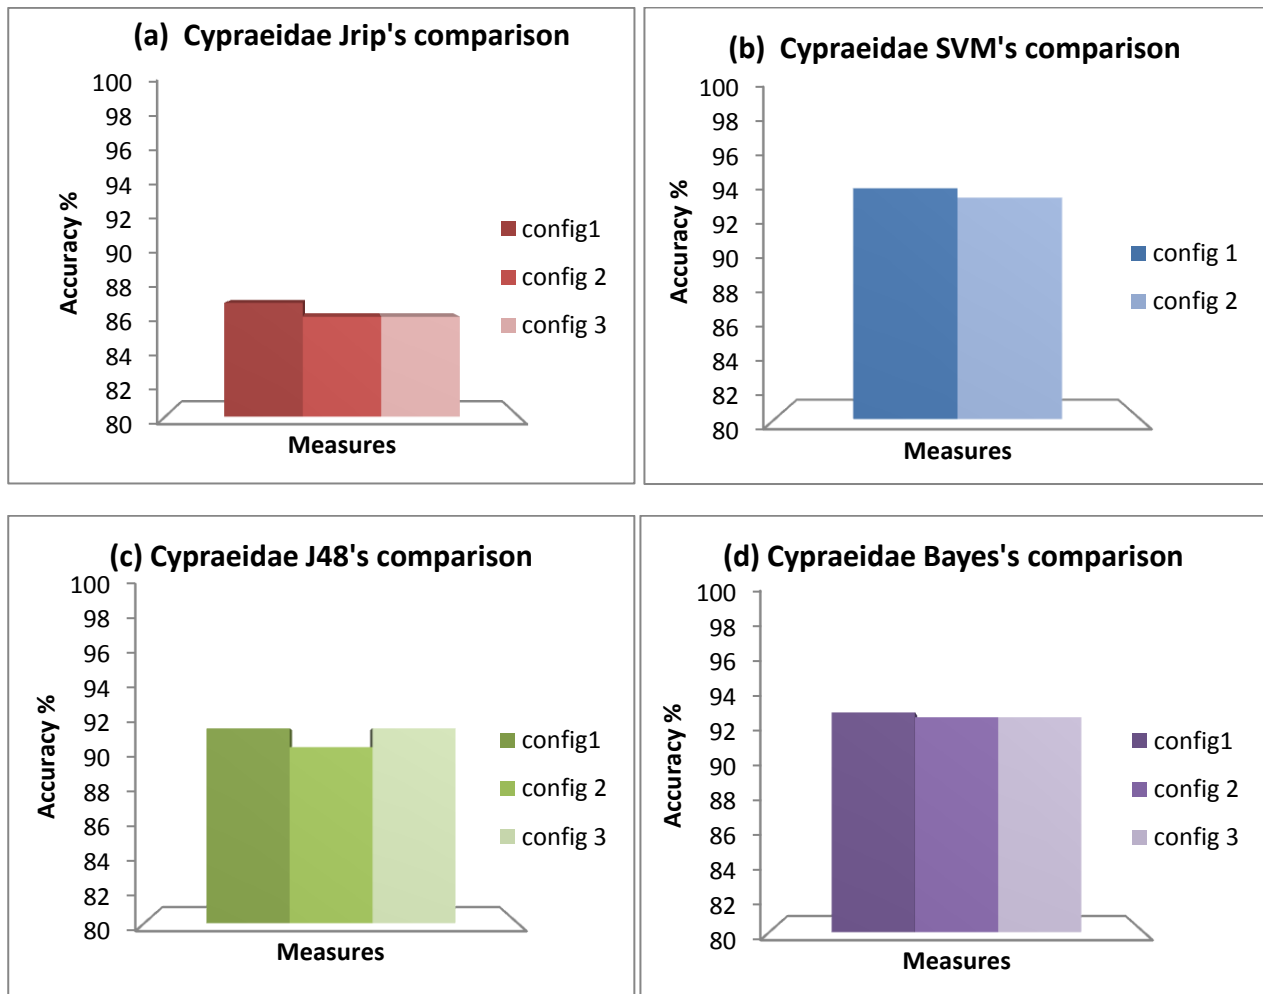

Figure S12 Results of comparative analysis performed on Cypraeidae empirical data set: (a) Configurations comparison of rules-based method Jrip; (b) Configurations comparison of function-based method SVM; (c) Configurations comparison of tree-based method J48; (d) Configurations comparison of Bayesian-based method Naïve Bayes.

*Drosophila*

**Table S3 Drosophila parameters configuration (see Table 3 for explanation of the default parameters configuration)**

| #Configuration | Jrip                      | SVM                             | J48                          | Naïve Bayes                       |
|----------------|---------------------------|---------------------------------|------------------------------|-----------------------------------|
| 1              | default                   | default                         | default                      | default                           |
| 2              | pruning=FALSE             | Standardization                 | reduce error<br>pruning=TRUE | kernel<br>estimator=TRUE          |
| 3              | optimization=10           | kernel=<br>RBF kernel           | use Laplace=TRUE             | supervised<br>discretization=TRUE |
| 4              | folds=20                  | built logisticmodel             | sub tree<br>raising=FALSE    | -                                 |
| 5              | optimization=5<br>folds=5 | kernel=normalized<br>polyKernel | unpruned=TRUE                | -                                 |

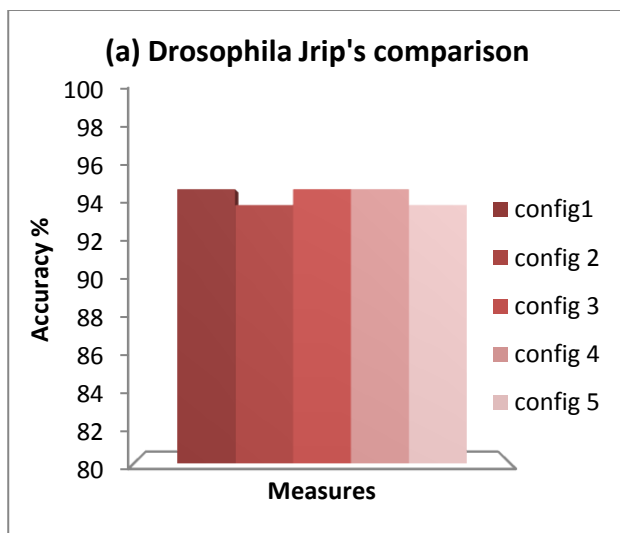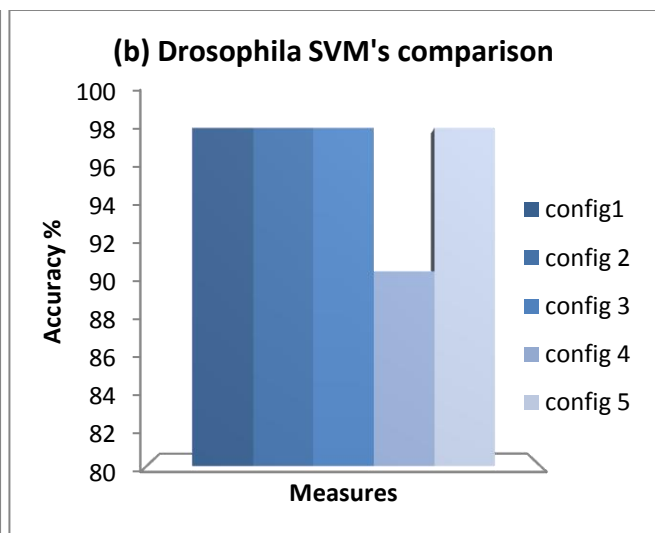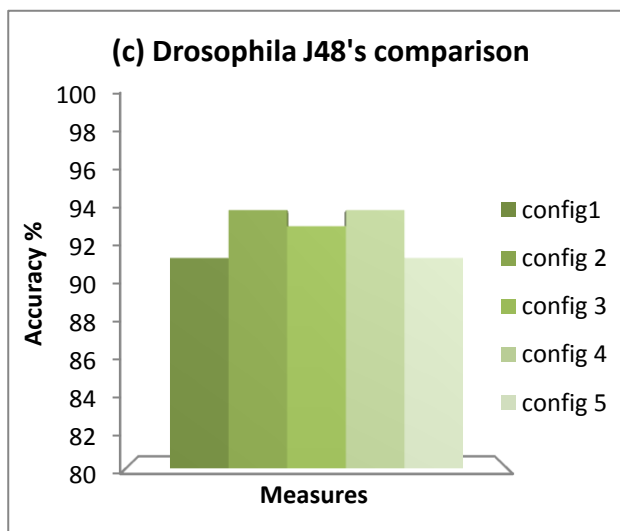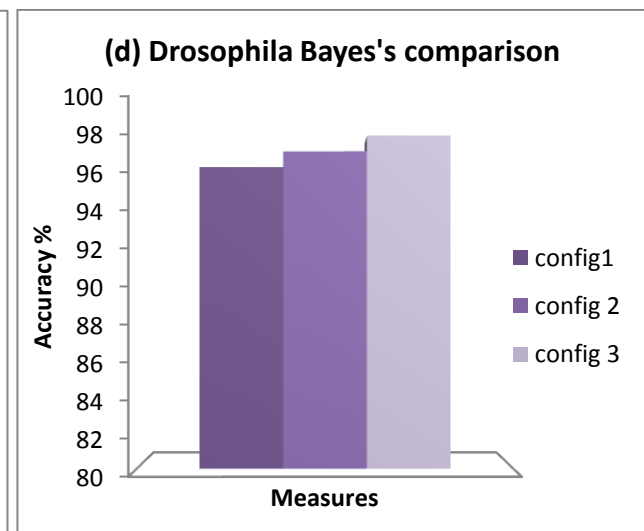

**Figure S13 Results of comparative analysis performed on Drosophila empirical data set:** (a) Configurations comparison of rules-based method Jrip; (b) Configurations comparison of function-based method SVM; (c) Configurations comparison of tree-based method J48; (d) Configurations comparison of Bayesian-based method Naïve Bayes.

Table S4 Inga parameters configuration (see Table 3 for explanation of the default parameters configuration)

| #Configuration | Jrip           | SVM                                   | J48                       | Naïve Bayes                    |
|----------------|----------------|---------------------------------------|---------------------------|--------------------------------|
| 1              | default        | default                               | default                   | default                        |
| 2              | pruning=FALSE  | filter Type=standardize training data | reduce error pruning=TRUE | kernel estimator=TRUE          |
| 3              | optimization=5 | kernel=RBF kernel                     | seed ≠ 1                  | supervised discretization=TRUE |
| 4              | -              | built logistic model                  | -                         | -                              |

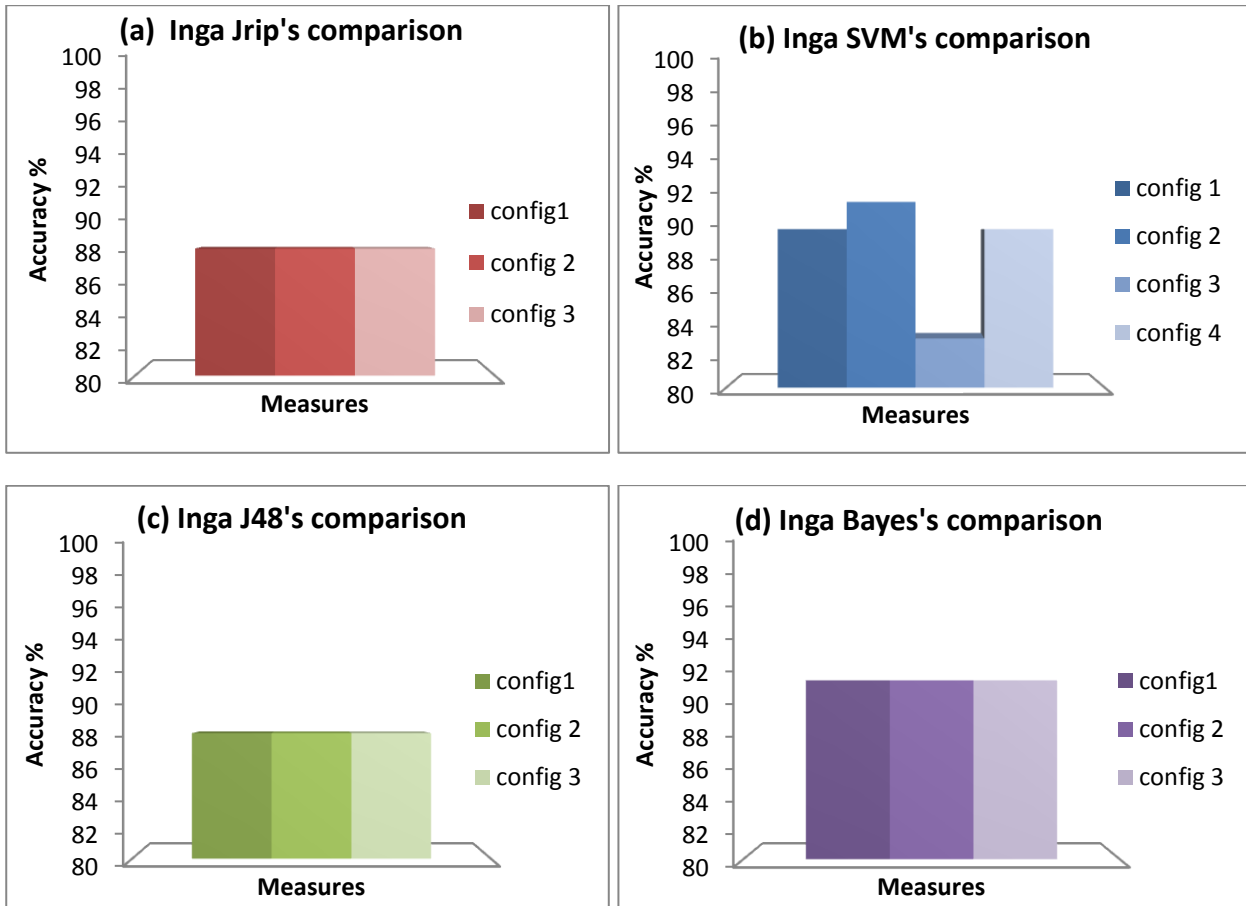

Figure S14 Results of comparative analysis performed on Inga empirical data set: (a) Configurations comparison of rules-based method Jrip; (b) Configurations comparison of function-based method SVM; (c) Configurations comparison of tree-based method J48; (d) Configurations comparison of Bayesian-based method Naïve Bayes.
